# Supplementary material for: Adiposity, breast density, and breast cancer risk: epidemiological and biological considerations
Source: PubMed Central journal article supplement — Eur J Cancer Prev. 2017 Sep 22;26(6):511–20. doi: 10.1097/CEJ.0000000000000310 (PMC5627530; doi:10.1097/cej.0000000000000310), 2017-09-22
Supplement: cej-26-511-s001.pdf [file cej-26-511-s001.pdf]

***Adiposity, breast density and breast cancer risk: epidemiological and biological considerations.*** Ludivine Soguel, Francine Durocher, André Tchernof and Caroline Diorio

### **Supplemental digital content 1**

Search strategy to review the relation between absolute non-dense area and breast cancer risk.

#### **Concept #1: “absolute non-dense area”**

((breast[MeSH Terms]) OR (breast[tiab])) AND ((non-dense[tiab]) OR (nondense[tiab]) OR (non dense[tiab]))

**Concept #2: “breast cancer risk”** (adapted from (World Cancer Research Fund and American Institute for Cancer Research, 2008))

**AND** (Breast Neoplasms [MeSH Terms] **OR** (breast[tiab] AND (cancer[tiab] OR neoplasm[tiab] OR tumour[tiab] OR tumor[tiab] OR carcinoma[tiab] OR adenocarcinoma[tiab])) **OR** (mammary[tiab] AND (cancer[tiab] OR neoplasm[tiab] OR tumour[tiab] OR tumor[tiab] OR carcinoma[tiab] OR adenocarcinoma[tiab])))

#### **Concept #3 “human studies”**

**NOT** ((animals[MeSH Terms]) NOT (humans[MeSH Terms]))

Search strategy performed for references cited in PubMed until February 9<sup>th</sup> 2015:

#1 **AND** #2 **NOT** #3

### **References**

World Cancer Research Fund, American Institute for Cancer Research (2008). Systematic Literature Review Continuous Update Report. The Associations between Food, Nutrition and Physical Activity and the Risk of Breast Cancer.
