# Supplementary material for: Adiposity, breast density, and breast cancer risk: epidemiological and biological considerations
Source: PubMed Central journal article supplement — Eur J Cancer Prev. 2017 Sep 22;26(6):511–20. doi: 10.1097/CEJ.0000000000000310 (PMC5627530; doi:10.1097/cej.0000000000000310), 2017-09-22
Supplement: cej-26-511-s002.pdf [file cej-26-511-s002.pdf]

***Adiposity, breast density and breast cancer risk: epidemiological and biological considerations.*** Ludivine Soguel, Francine Durocher, André Tchernof and Caroline Diorio

**Supplemental digital content 2**

Search strategy to review the relation between adiposity and breast density features.

**Concept 1: “adiposity”** (adapted from (World Cancer Research Fund and American Institute for Cancer Research, 2008))

(anthropometry[tiab]) OR (anthropometry[MeSH Terms]) OR (adiposity[tiab]) OR (adiposity[MeSH Terms]) OR (body weight[MeSH Terms]) OR (weight loss[tiab]) OR (weight loss[MeSH Terms]) OR (weight gain[tiab]) OR (weight gain[MeSH Terms]) OR (body composition[tiab]) OR (body composition[MeSH Terms]) OR (body constitution[MeSH Terms]) OR (DEXA[tiab]) OR (bio-impedance[tiab]) OR (BIA[tiab]) OR (skinfold measurement\*[tiab]) OR (skinfold thickness[tiab]) OR (skinfold thickness[MeSH Terms]) OR (waist circumference[tiab]) OR (waist circumference[MeSH Terms]) OR (hip circumference[tiab]) OR (waist hip ratio\*[tiab]) OR (waist-hip ratio\*[tiab]) OR (waist-hip ratio[MeSH Terms]) OR (BMI[tiab]) OR (body mass[tiab]) OR (Body mass index[MeSH Terms]) OR (obesity[tiab]) OR (obese[tiab]) OR (obesity[MeSH Terms]) OR (overweight[tiab]) OR (over-weight[tiab]) OR (over weight[tiab]) OR (overweight[MeSH Terms])

**Concept 2: “breast density”**

((breast[MeSH Terms]) OR (breast[tiab])) AND ((absolute[tiab]) OR (dense[tiab]) OR (non-dense[tiab]) OR (nondense[tiab])) AND ((area[tiab]) OR (region[tiab])) OR (((breast[MeSH Terms]) OR (breast[tiab])) AND ((density[tiab]) OR (densities[tiab]))) OR (((breast[MeSH Terms]) OR (breast[tiab])) AND (parenchymal[tiab]) AND ((pattern[tiab]) OR (patterns[tiab]))) OR (Mammographic Density[Supplementary Concept]) OR ((mammographic[tiab]) AND ((density[tiab]) OR (densities[tiab]))) OR (((mammographic[tiab]) OR (breast[MeSH Terms]) OR (breast[tiab])) AND ((tissues[MeSH Terms]) OR (tissues[tiab]) OR (tissue[tiab])))

Search strategy performed for references cited in PubMed until February 9<sup>th</sup> 2015:

#1 **AND** #2 **NOT** #3

**References :**

World Cancer Research Fund, American Institute for Cancer Research (2008). Systematic Literature Review Continuous Update Report. The Associations between Food, Nutrition and Physical Activity and the Risk of Breast Cancer.
