# Supplementary material for: Adiposity, breast density, and breast cancer risk: epidemiological and biological considerations
Source: PubMed Central journal article supplement — Eur J Cancer Prev. 2017 Sep 22;26(6):511–20. doi: 10.1097/CEJ.0000000000000310 (PMC5627530; doi:10.1097/cej.0000000000000310), 2017-09-22

**Supplemental digital content 3**

PRISMA flow chart for the systematic review of the relation between adiposity and breast density features.

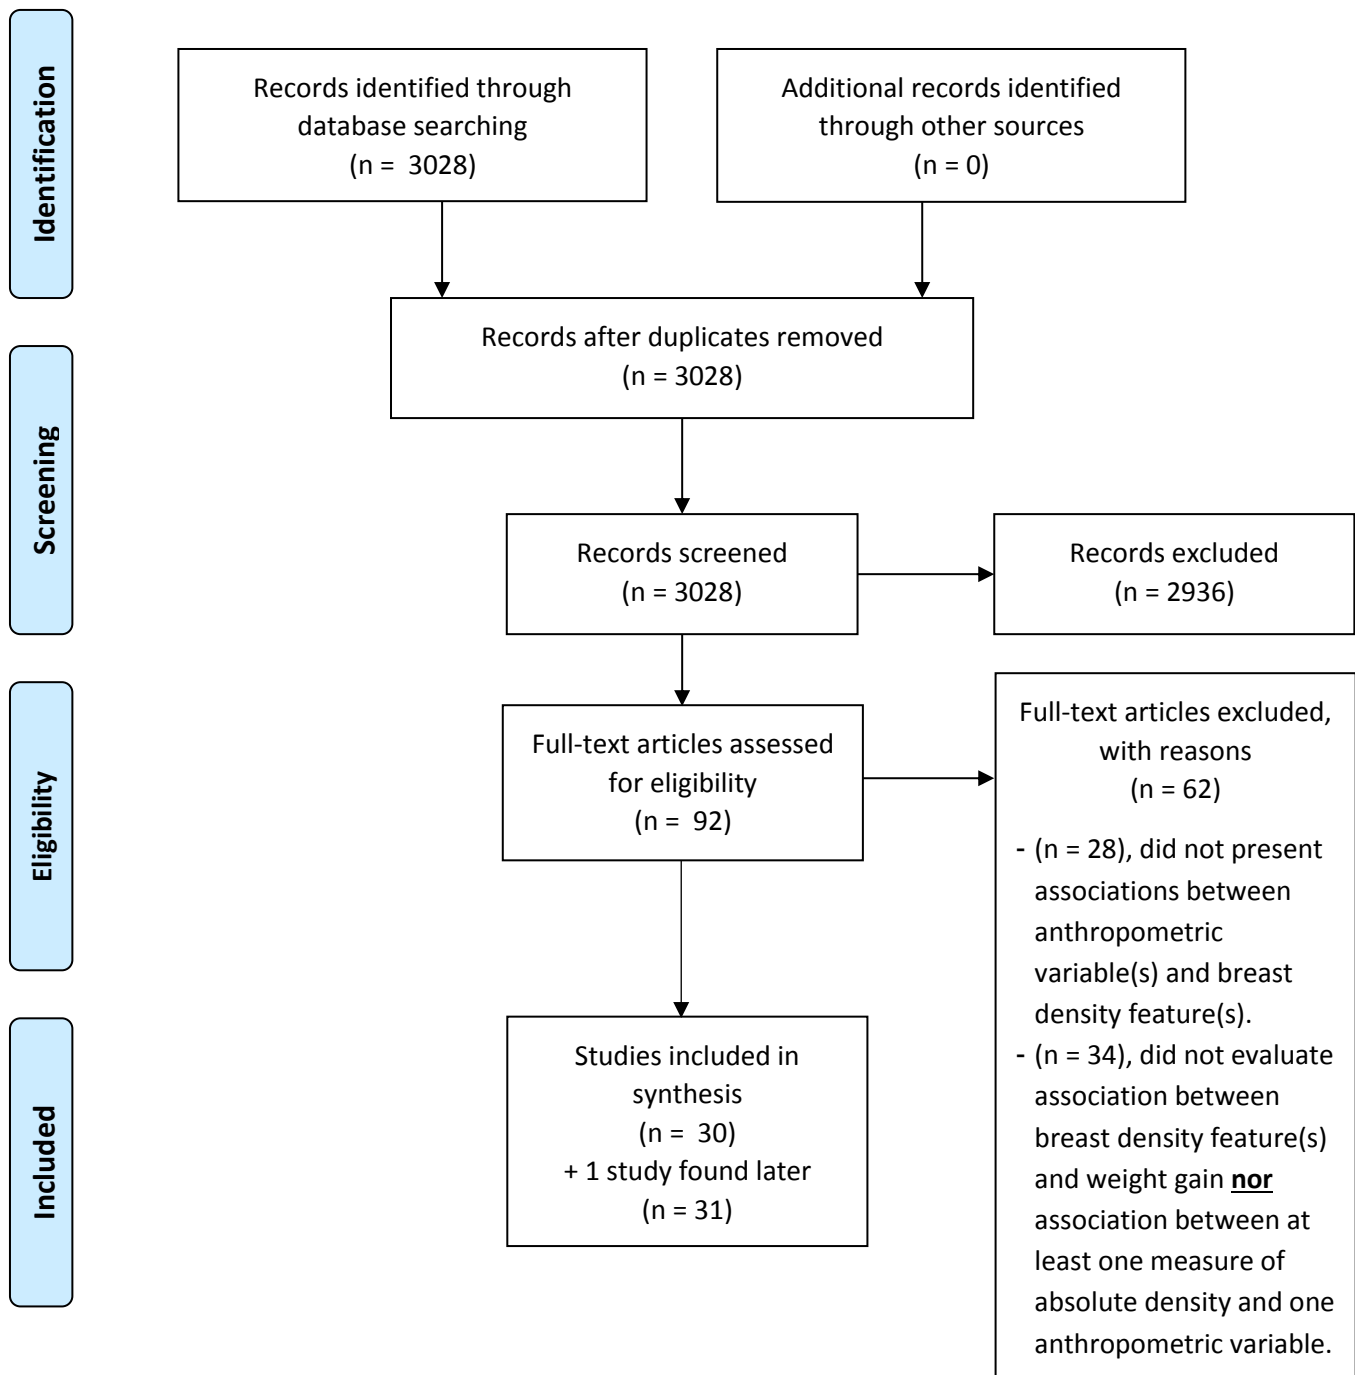

Supplement: cej-26-511-s003.pdf [file cej-26-511-s003.pdf]
